# Supplementary material for: Long noncoding RNA uc003pxg.1 regulates endothelial cell proliferation and migration via miR-25-5p in coronary artery disease
Source: PubMed Central journal article supplement — Int J Mol Med. 2021 Jul 2;48(2):160. doi: 10.3892/ijmm.2021.4993 (PMC8262661; doi:10.3892/ijmm.2021.4993), 2021-07-02

## Data S1.

*Information of uc003pxg.1 and hsa-miR-25-5p.* Genomic location and sequence of uc003pxg.1: locus, chr6:116999739-117001922; gene ID, AX746765; lncRNA source, UCSC\_knowngene.

*Binding target prediction of hsa-miR-25-5p and uc003pxg.1 (miRanda).*

>hsa-miR-25-5p MIMAT0004498

AGGCGGAGACUUGGGCAAUUG

>uc003pxg.1

ctttatatgctctgctcgttttattcaagctttttgctcattataatttatattctataacatctgcgggtttttgttttctgtttt  
gggggggtttttgagacggagctctggcgctgcaccaggctggagtgcatgatcgcgatctcggtcactgcaacctccg  
ctcccagggtcaagcattctctgcctcagcctccaagtagctgggactacaggcatgcgccaccacgcccagccta  
ttttgattttagtagagaccaggtttaccgtgtggccaggatggctctgatctctgacctctgatccgcccgcctcagcc  
tccaaagtgtgggattacaggcatgagccaccacaccagccacatgagtgtttttgacagcaatgtagtcaccaata  
aacgagtaactcagttaaagtactgtagattataatacacagccctgtaatctacctggagttcaacaacggattgaaaa  
cagactgtgtccagatgcaatggaagagaataaataagataacaatacataaatctgccagaagacgtttgcaat  
ttaagaggaaaaacatgaagacaaattgtttaagatgtttgctattttcaatggtgaaaaataaacaggagagaaggatt  
ttaatgtgggtatgtaggctgagaaaggcacgcttgacaaaggaaacctgggcagtgttaccagaaagcgttgccaatc  
atgagtccatatagtgaagtgaagcaagtttataaagaagtaaaagacaaaagaatggctactccataggcagagcag  
tggttgggctgctggactgagtatatagtttttgtgtgtttgtttgtttgacacggagcttctgctctgctgccaggctg  
agtgcagtgccgcatctcggctcactgcaagctccgggtcacgccattctctgcctcagcctcccagtag  
ctggaaattattgtatttttagtagagacagggtttaccgtgttagccaggatggctcaatctactgacctggtgatcctc  
ggctcggcctccaaagtgtgggattacaggcgtgagccaccgcgccagccagttatttctaattatgtaaaacaag  
gggtggattattcatgagtttcaaggaagggggcaggcaatgttgaacttagggttctaccctcttttagactgtatgactc  
tgatgttgccatggcattgtaaactgcatggtgctggtgggagtgcttttagcatgctaatacattataatcagttataat  
agaagtgaggatgaccagaggtcactttgtctcatcttggtttgggtgggttggcctgtctctttacgacatcctgtttatca  
gcagggtcttgtgacctgtatcttgcgtggacctccaatctctgtgactaagaatgcctaacctcctgggaatgcagctcag  
taggtctcagcctcgtttaccagcacctgttcaagttggagtcactctggttcaaacgctctgacaacaggactattggag  
tactgataggagtttatttgccttaatacctggccaccctatccctttcttctcctactcctcctcctgggagactgaa  
ttcaaatagacaatggccagagaatatacaaatagaacactaacctacaacctcaacaaccagtcagggaaggcaacc  
tactatgtccagtaaccagtcagaatcagattactatatttagcaaccagtcagggaagccaagcaataacctgttagc  
aatctaccccaaatggccaggacgtgattaataactacagcttctgtaagttttgcagggttccaactcaaggccagctag  
agagagccaaatatctaccacccctaaataattacataggatgcctgcttttagtagccacctgcagcttctccatgcca  
acagccttgaattggcatacctgaagcttcccttttccactctaaagcttctcactcctctgctgccgttgagtctctgaca  
aatgcaagtgatgatggctgactccctgtattgtaagctccaaataaattggcttctgttctc

Performing Scan: hsa-miR-25-5p vs uc003pxg.1

①Forward: Score: 151.000000 Q: 2 to 14 R: 952 to 971 Align Len (12) (91.67%)  
(91.67%)

Query: 3' guuaacggGUUCAGAGGCGGa 5'

Ref: 5' gctcactgCAAG - CTCCGCCt 3'

Energy: -22.690001 kCal/Mol

Scores for this hit:

>hsa-miR-25-5p uc003pxg.1151.00 -22.69 2 14 952 971 12 91.67% 91.67%

②Forward: Score: 143.000000 Q: 2 to 14 R: 164 to 183 Align Len (12) (83.33%) (83.33%)

Query: 3' guuaacggGUUCAGAGGCGGa 5'

                  | | |       | | | | | | | |  
Ref: 5' gctcactgCAA -CCTCCGCCt 3'

Energy: -19.969999 kCal/Mol

Scores for this hit:

>hsa-miR-25-5p uc003pxg.1143.00 -19.97 2 14 164 183 12 83.33% 83.33%

Figure S1. Confocal microscopy images of EdU staining to assess cell proliferation. The names of the long noncoding RNAs correspond to specific small interfering RNAs. EdU, 5-ethynyl-2'-deoxyuridine; HUVEC, human umbilical vein endothelial cell; NC, negative control small interfering RNA.

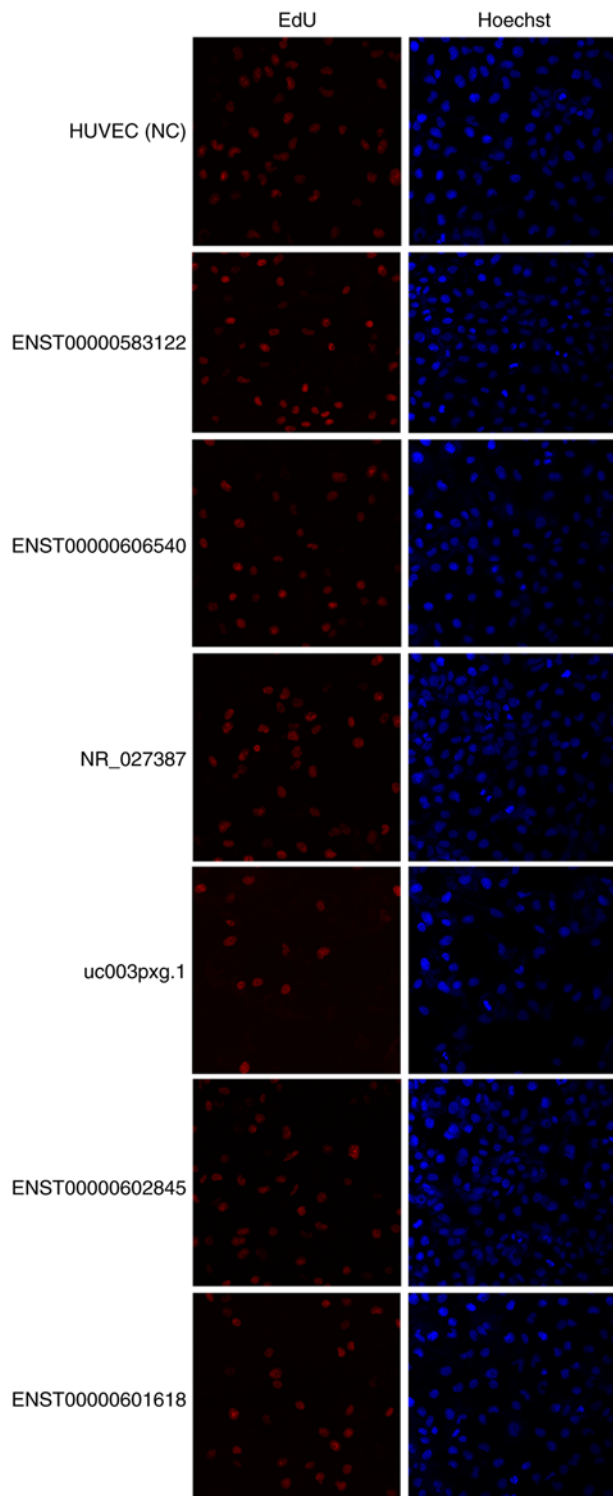

Supplement: Supplementary_Data1.pdf [file Supplementary_Data1.pdf]
